# Supplementary material for: Hierarchical Porous Carbon Electrodes with Sponge-Like Edge Structures for the Sensitive Electrochemical Detection of Heavy Metals
Source: MDPI journal article supplement (doi:10.3390/s21041346), 2021-02-14
Supplement: s1 [file s1]

## Supporting Information: Hierarchical Porous Carbon Electrodes with Sponge-Like Edge Structures for the Sensitive Electrochemical Detection of Heavy Metals

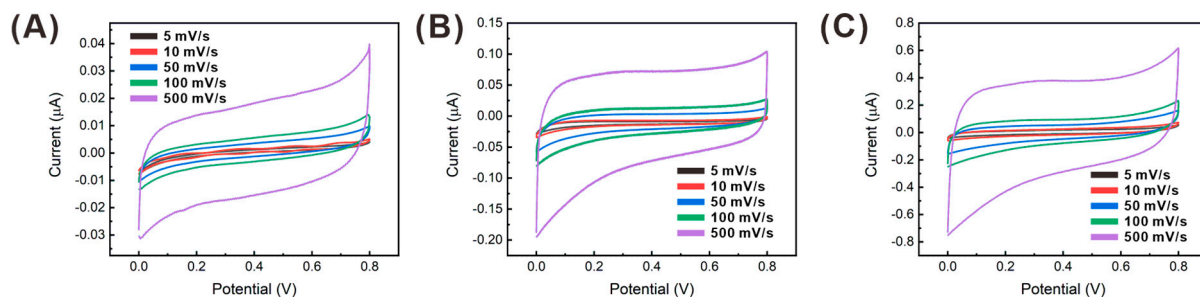

**Figure S1.** Cyclic voltammograms of (A) bare carbon (BC), (B) porous carbon (PC), and (C) hierarchical porous carbon (HPC) electrodes in 0.2 M  $\text{K}_2\text{SO}_4$  at different scan rates.

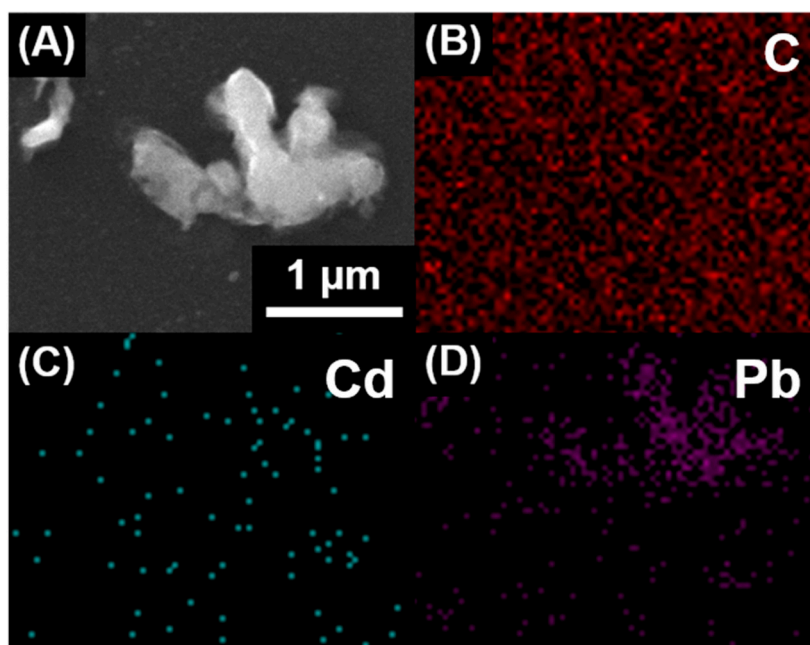

**Figure S2.** (A) SEM image and (B–D) EDS mapping of a BC electrode with electrodeposited heavy metal alloys (Cd: 10 mg  $\text{L}^{-1}$ , Pb: 10 mg  $\text{L}^{-1}$ , Bi: 400  $\mu\text{g L}^{-1}$ ).

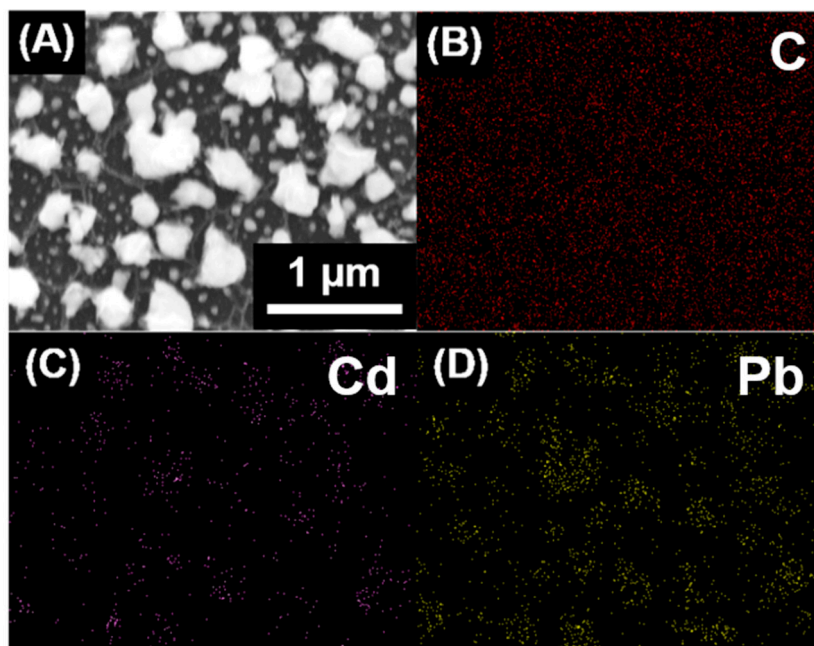

**Figure S3.** (A) SEM image and (B–D) EDS mapping of a PC electrode with electrodeposited heavy metal alloys (Cd: 10 mg L<sup>-1</sup>, Pb: 10 mg L<sup>-1</sup>, Bi: 400 μg L<sup>-1</sup>).

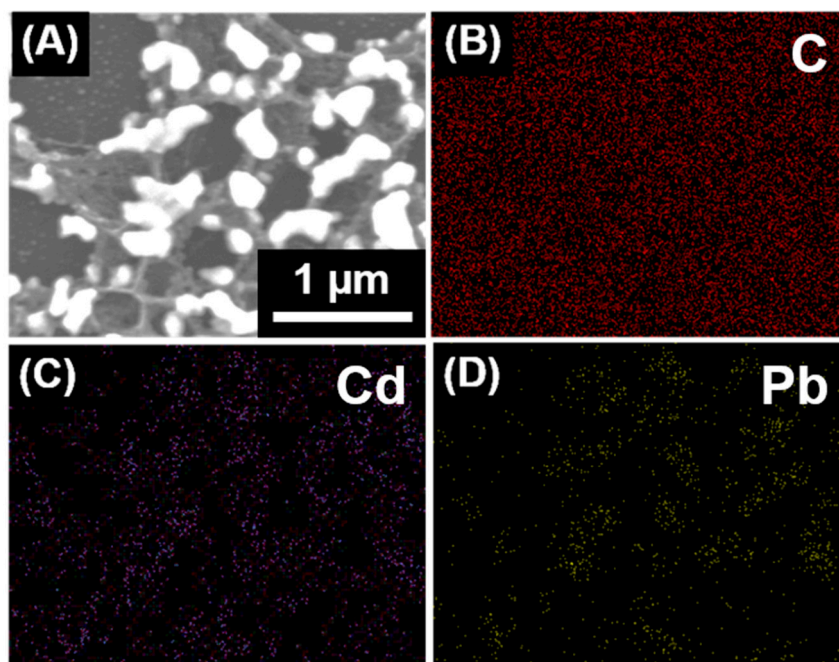

**Figure S4.** (A) SEM image and (B–D) EDS mapping of a HPC electrode with electrodeposited heavy metal alloys (Cd: 10 mg L<sup>-1</sup>, Pb: 10 mg L<sup>-1</sup>, Bi: 400 μg L<sup>-1</sup>).

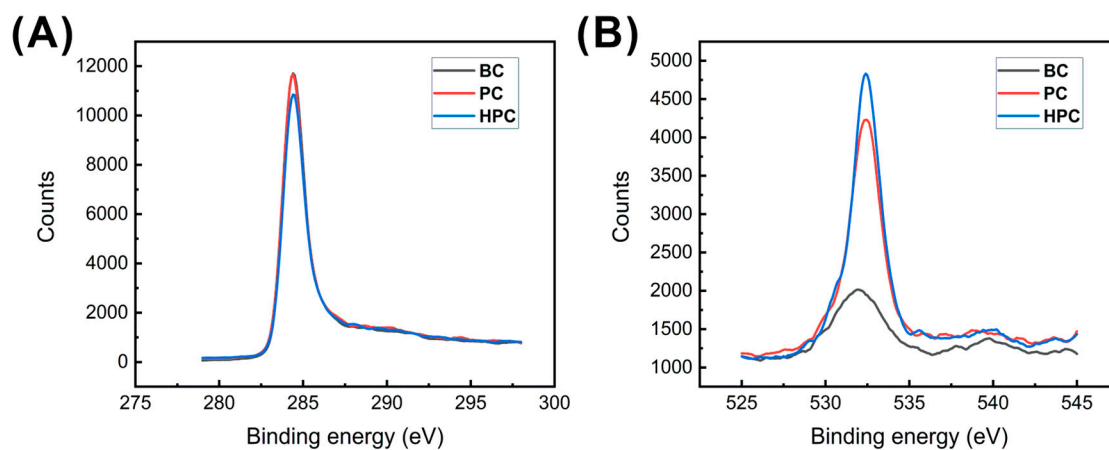

**Figure S5.** XPS spectrum of BC, PC, and HPC electrodes in (A) C1s and (B) O1s regions.

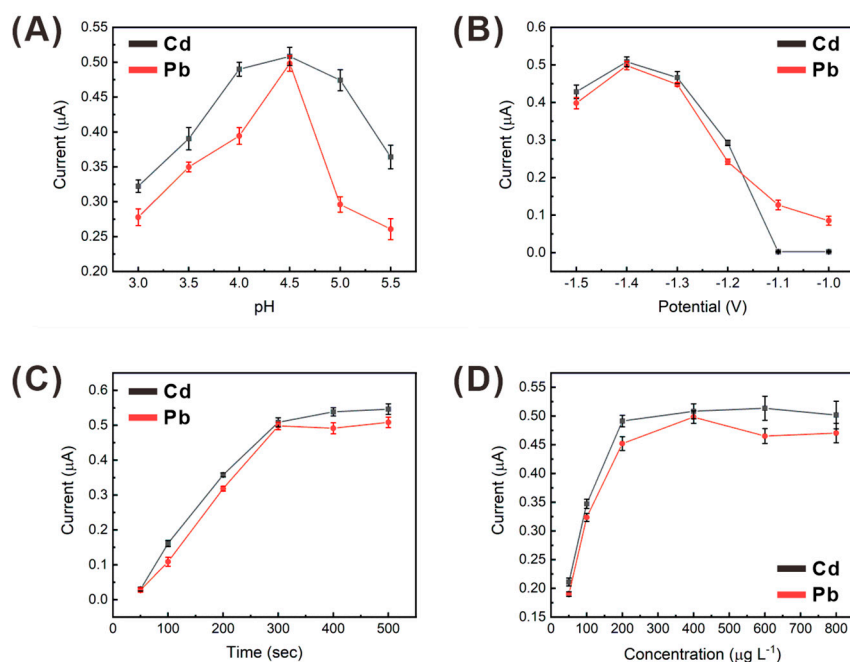

**Figure S6.** Anodic stripping peak current responses of  $50 \mu\text{g L}^{-1}$  cadmium (black line) and  $50 \mu\text{g L}^{-1}$  lead (red line) in SWASV under different preconcentration conditions: (A) pH, (B) preconcentration potential, (C) preconcentration time, and (D) Bi concentration.

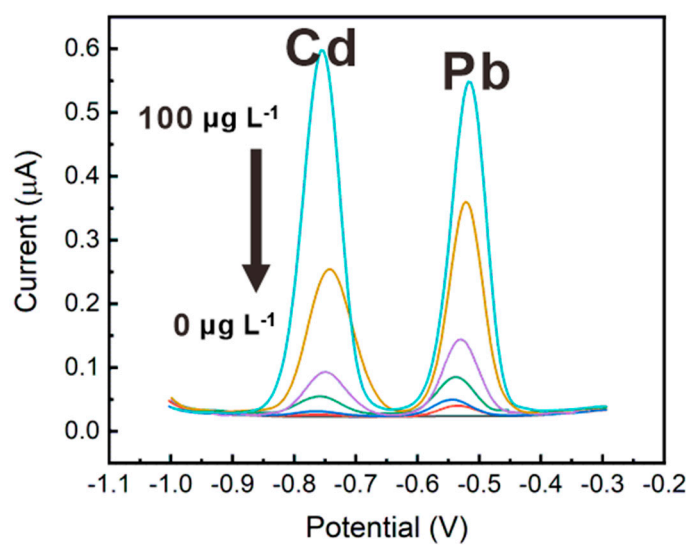

**Figure S7.** SWASV curves obtained at various concentrations (0, 1, 5, 10, 20, 50, 100  $\mu\text{g L}^{-1}$ ) of cadmium and lead spiked in tap water buffered with a NaAc solution using the HPC-based heavy metal sensor.

**Table S1.** ICP-MS analysis of tap water samples.

| Analyte | Found        | %RSD  | Analyte | Found       | %RSD | Analyte | Found        | %RSD  |
|---------|--------------|-------|---------|-------------|------|---------|--------------|-------|
| Na      | 15.69<br>ppm | 2.55  | Mg      | 1.24<br>ppm | 4.13 | K       | 11.50<br>ppm | 14.57 |
| Ca      | 21.34<br>ppm | 12.04 | Fe      | N/A         | -    | Cu      | 6.2<br>ppb   | 24.82 |
| Zn      | 2.77<br>ppm  | 12.64 | Cd      | N/A         | -    | Pb      | N/A          | -     |
